# Supplementary material for: Exploring non-retention in clinical trials: a meta-ethnographic synthesis of studies reporting participant reasons for drop out
Source: PubMed Central journal article supplement (PMC6561611; doi:10.1136/bmjopen-2018-021959), 2019-06-03
Supplement: bmjopen-2018-021959supp002.pdf [file bmjopen-2018-021959supp002.pdf]

S3 Table

| Themes                 | Inter-relationship between self and trial processes/procedures                      |                             |                                                                                      |           |            |               |               |               |                                                                                 |                                           |                          |                                                      |                                   |                                                                                                                                      |
|------------------------|-------------------------------------------------------------------------------------|-----------------------------|--------------------------------------------------------------------------------------|-----------|------------|---------------|---------------|---------------|---------------------------------------------------------------------------------|-------------------------------------------|--------------------------|------------------------------------------------------|-----------------------------------|--------------------------------------------------------------------------------------------------------------------------------------|
|                        | 1. Perceptions of current health state in relation to specific aspects of the trial |                             | 2. The 'fit of aspects of the trial with individual preferences for care and support |           |            |               |               |               | 3. The compatibility of aspects of trial processes with individual capabilities |                                           |                          | 4. Concerns about or experiences of trial medication |                                   | 5. Considerations around the extent to which trial participation could be appropriately accommodated into individuals' broader lives |
| 14 Sub-themes          | Perception of being too well                                                        | Perception of being too ill | Not individual /tailored/ personalised enough                                        | Too basic | Inflexible | Too technical | Too intensive | Too stressful | Not tailored to individual capabilities                                         | Cognitively not pitched at the individual | Medication not necessary | Potentially dangerous                                | Contraindications or side effects | Aspects of life getting in the way                                                                                                   |
| Nakash 2008            | *                                                                                   |                             |                                                                                      |           |            |               |               |               |                                                                                 | *                                         |                          |                                                      |                                   | *                                                                                                                                    |
| Nicholas 2010          | *                                                                                   | *                           | *                                                                                    | *         | *          |               |               |               |                                                                                 |                                           |                          |                                                      |                                   | *                                                                                                                                    |
| Postel 2010            | *                                                                                   |                             |                                                                                      |           |            |               | *             | *             |                                                                                 |                                           |                          |                                                      |                                   | *                                                                                                                                    |
| Eborall 2011           | *                                                                                   |                             |                                                                                      |           |            |               |               |               |                                                                                 |                                           | *                        |                                                      | *                                 | *                                                                                                                                    |
| Wells 2011             | *                                                                                   | *                           |                                                                                      |           |            |               |               |               |                                                                                 | *                                         |                          |                                                      |                                   |                                                                                                                                      |
| Shilling 2011          |                                                                                     |                             |                                                                                      |           |            |               |               |               |                                                                                 |                                           |                          | *                                                    | *                                 |                                                                                                                                      |
| Sanders 2012           | *                                                                                   |                             |                                                                                      | *         | *          | *             |               |               |                                                                                 |                                           |                          |                                                      |                                   |                                                                                                                                      |
| Johansson 2015         | *                                                                                   | *                           | *                                                                                    |           | *          |               |               |               | *                                                                               | *                                         |                          |                                                      |                                   | *                                                                                                                                    |
| Sari 2017              | *                                                                                   |                             |                                                                                      |           |            |               | *             |               |                                                                                 |                                           |                          |                                                      |                                   | *                                                                                                                                    |
| Fernandez-Alvarez 2017 |                                                                                     | *                           | *                                                                                    | *         |            |               |               |               |                                                                                 |                                           |                          |                                                      |                                   | *                                                                                                                                    |
| Henshall 2018          |                                                                                     | *                           |                                                                                      |           |            |               |               |               |                                                                                 |                                           |                          |                                                      |                                   | *                                                                                                                                    |

\*Denotes presence of themes across papers
