# Supplementary material for: Exploring non-retention in clinical trials: a meta-ethnographic synthesis of studies reporting participant reasons for drop out
Source: PubMed Central journal article supplement (PMC6561611; doi:10.1136/bmjopen-2018-021959), 2019-06-03

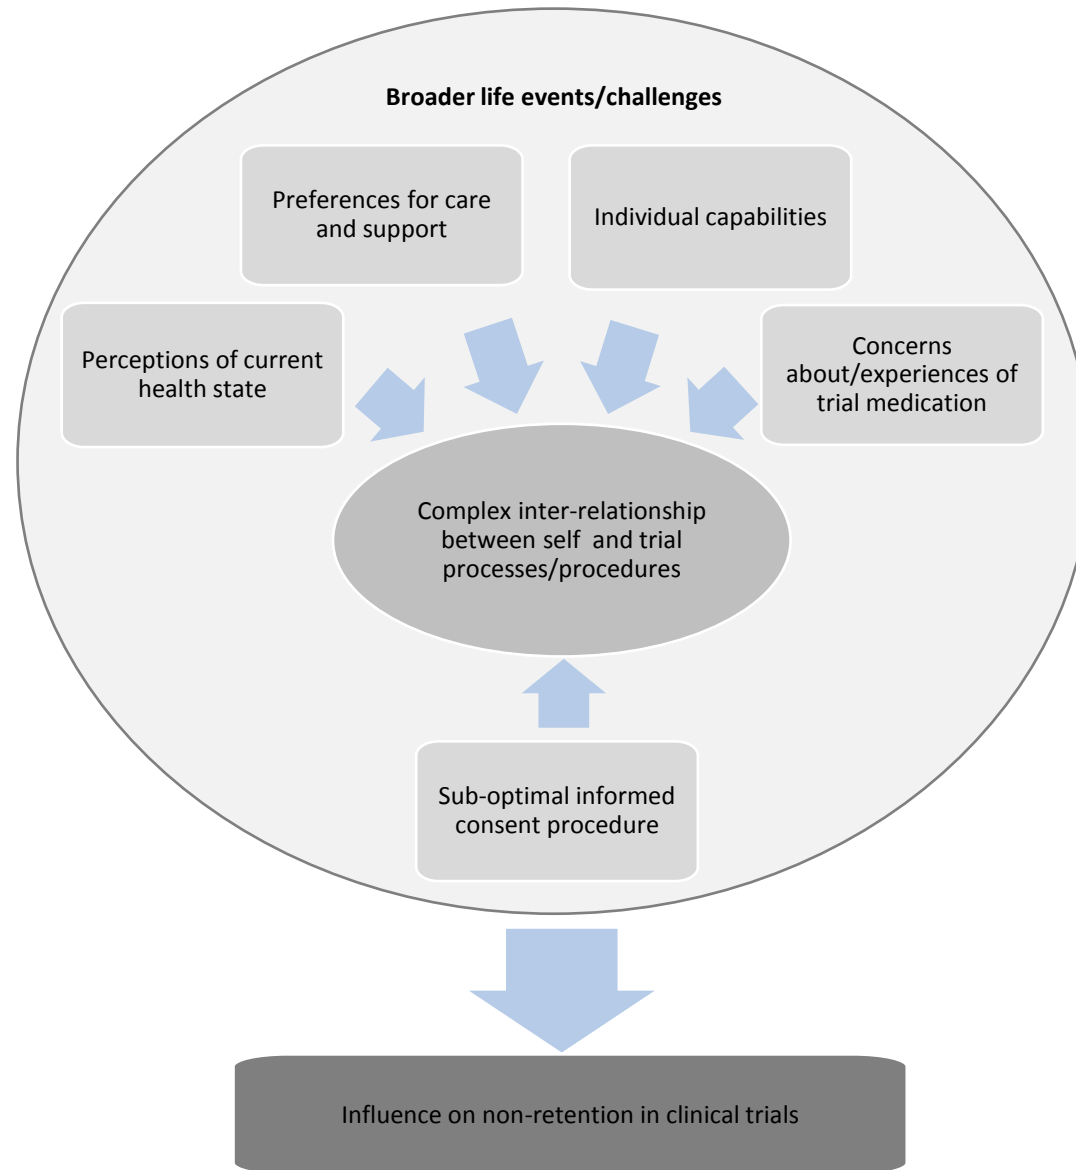

Supplement: bmjopen-2018-021959supp010.pdf [file bmjopen-2018-021959supp010.pdf]
